# Supplementary material for: Enhanced anti-stocks luminescence in LaNbO4:Ln3+ (Ln3+ = Yb3+, Er3+/Ho3+/Tm3+) with abundant color
Source: Royal Society of Chemistry journal article supplement (doi:10.1039/c6ra28592a), 2017-01-01
Supplement: c6ra28592a1.pdf [file c6ra28592a1.pdf]

## Supporting Information

### **Enhanced Anti-stocks Luminescence in $\text{LaNbO}_4: \text{Ln}^{3+}$ ( $\text{Ln}^{3+} = \text{Yb}^{3+}, \text{Er}^{3+}/\text{Ho}^{3+}/\text{Tm}^{3+}$ ) With Abundant Color**

Huining Huang <sup>a</sup>, Haifeng Zhou <sup>b</sup>, Juan Zhou <sup>c</sup>, Tao Wang <sup>a</sup>, Dapeng Huang <sup>a</sup>, Yaqiang Wu <sup>a</sup>, Leilei Sun <sup>a</sup>, Guangjun Zhou <sup>a,\*</sup>, Jie Zhan <sup>a</sup>, Jifan Hu <sup>a</sup>

<sup>a</sup> *State Key Laboratory of Crystal Materials, Shenzhen Research Institute, Shandong University, Jinan 250100, P. R. China*

<sup>b</sup> *School of Materials Science and Engineering, Qilu University of Technology, Jinan 250353, P. R. China*

<sup>c</sup> *Center for Disease Prevention and Control of Jinan Military Command, Jinan 250014, P. R. China.*

\*Corresponding author. E-mail address: [gjzhou@sdu.edu.cn](mailto:gjzhou@sdu.edu.cn).

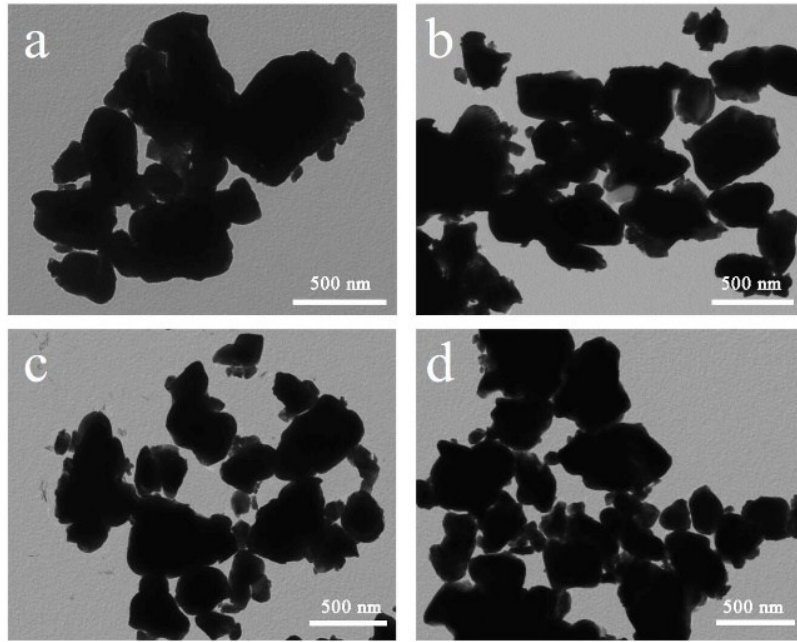

Fig. S1 TEM images of the as-prepared (a) LNO, (b) LNO: 0.10Yb<sup>3+</sup>, 0.02Er<sup>3+</sup>, (c) LNO: 0.15Yb<sup>3+</sup>, 0.005Ho<sup>3+</sup>, (d) LNO: 0.15Yb<sup>3+</sup>, 0.003Tm<sup>3+</sup>.

---
